# Supplementary material
Source: PubMed Central journal article supplement (PMC4561509)
Supplement: NIHMS64121-supplement-Supplementary_appendix_2.pdf [file NIHMS64121-supplement-Supplementary_appendix_2.pdf]

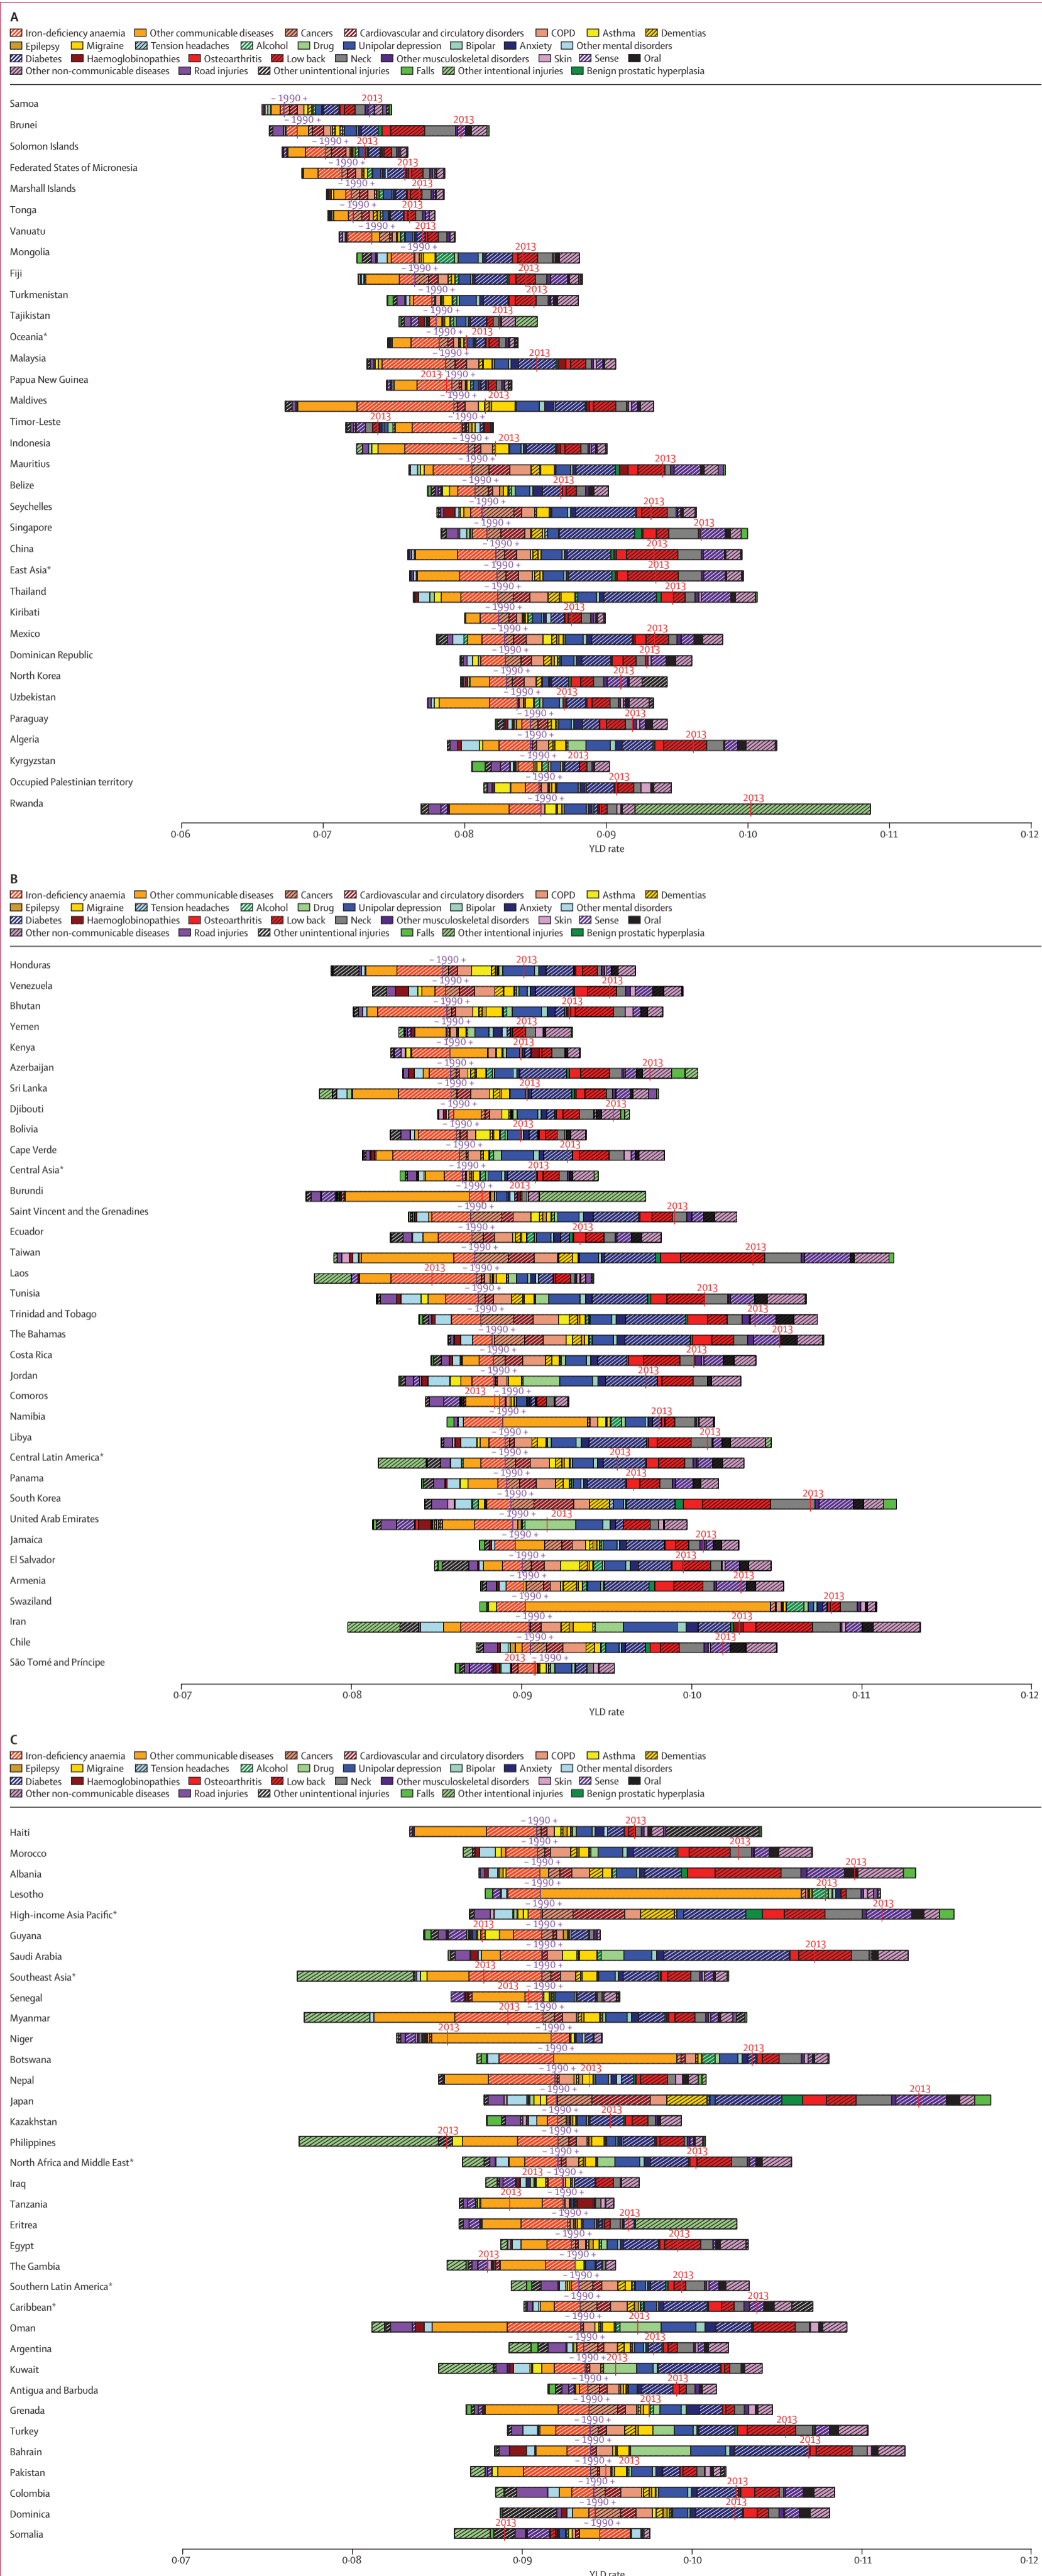

**Figure appendix: Change in YLD rate from 1990 to 2013 for 188 countries and 21 regions (changes have been decomposed into 31 major cause groups and countries are ordered by the YLD rate in 1990)**

Reductions in YLD rates per person from a cause from 1990 to 2013 are shown as coloured bars to the left of the 1990 starting level and increases in YLD rates per person from a cause are shown as bars to the right of the starting line. YLD=years lived with disability. COPD=chronic obstructive pulmonary disease. \* Regions.

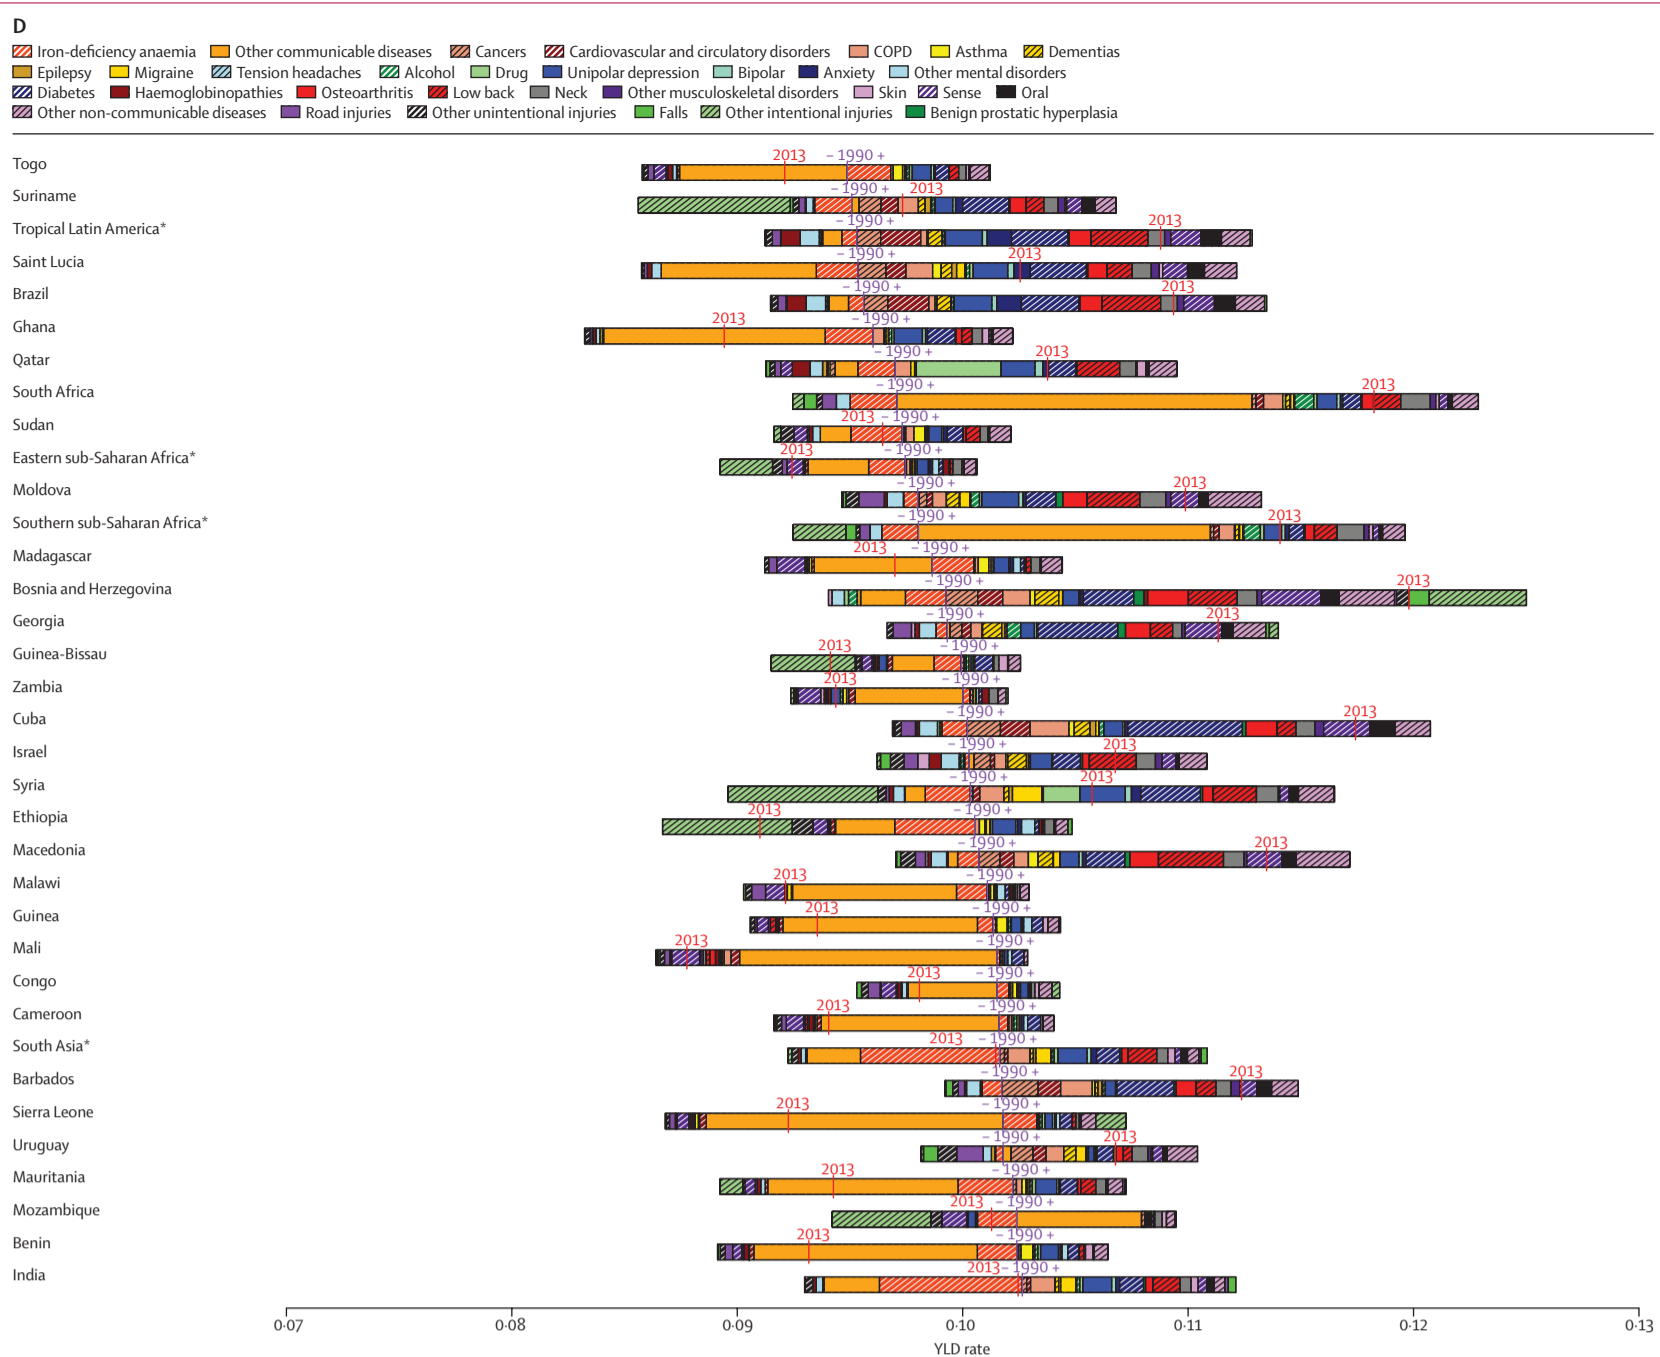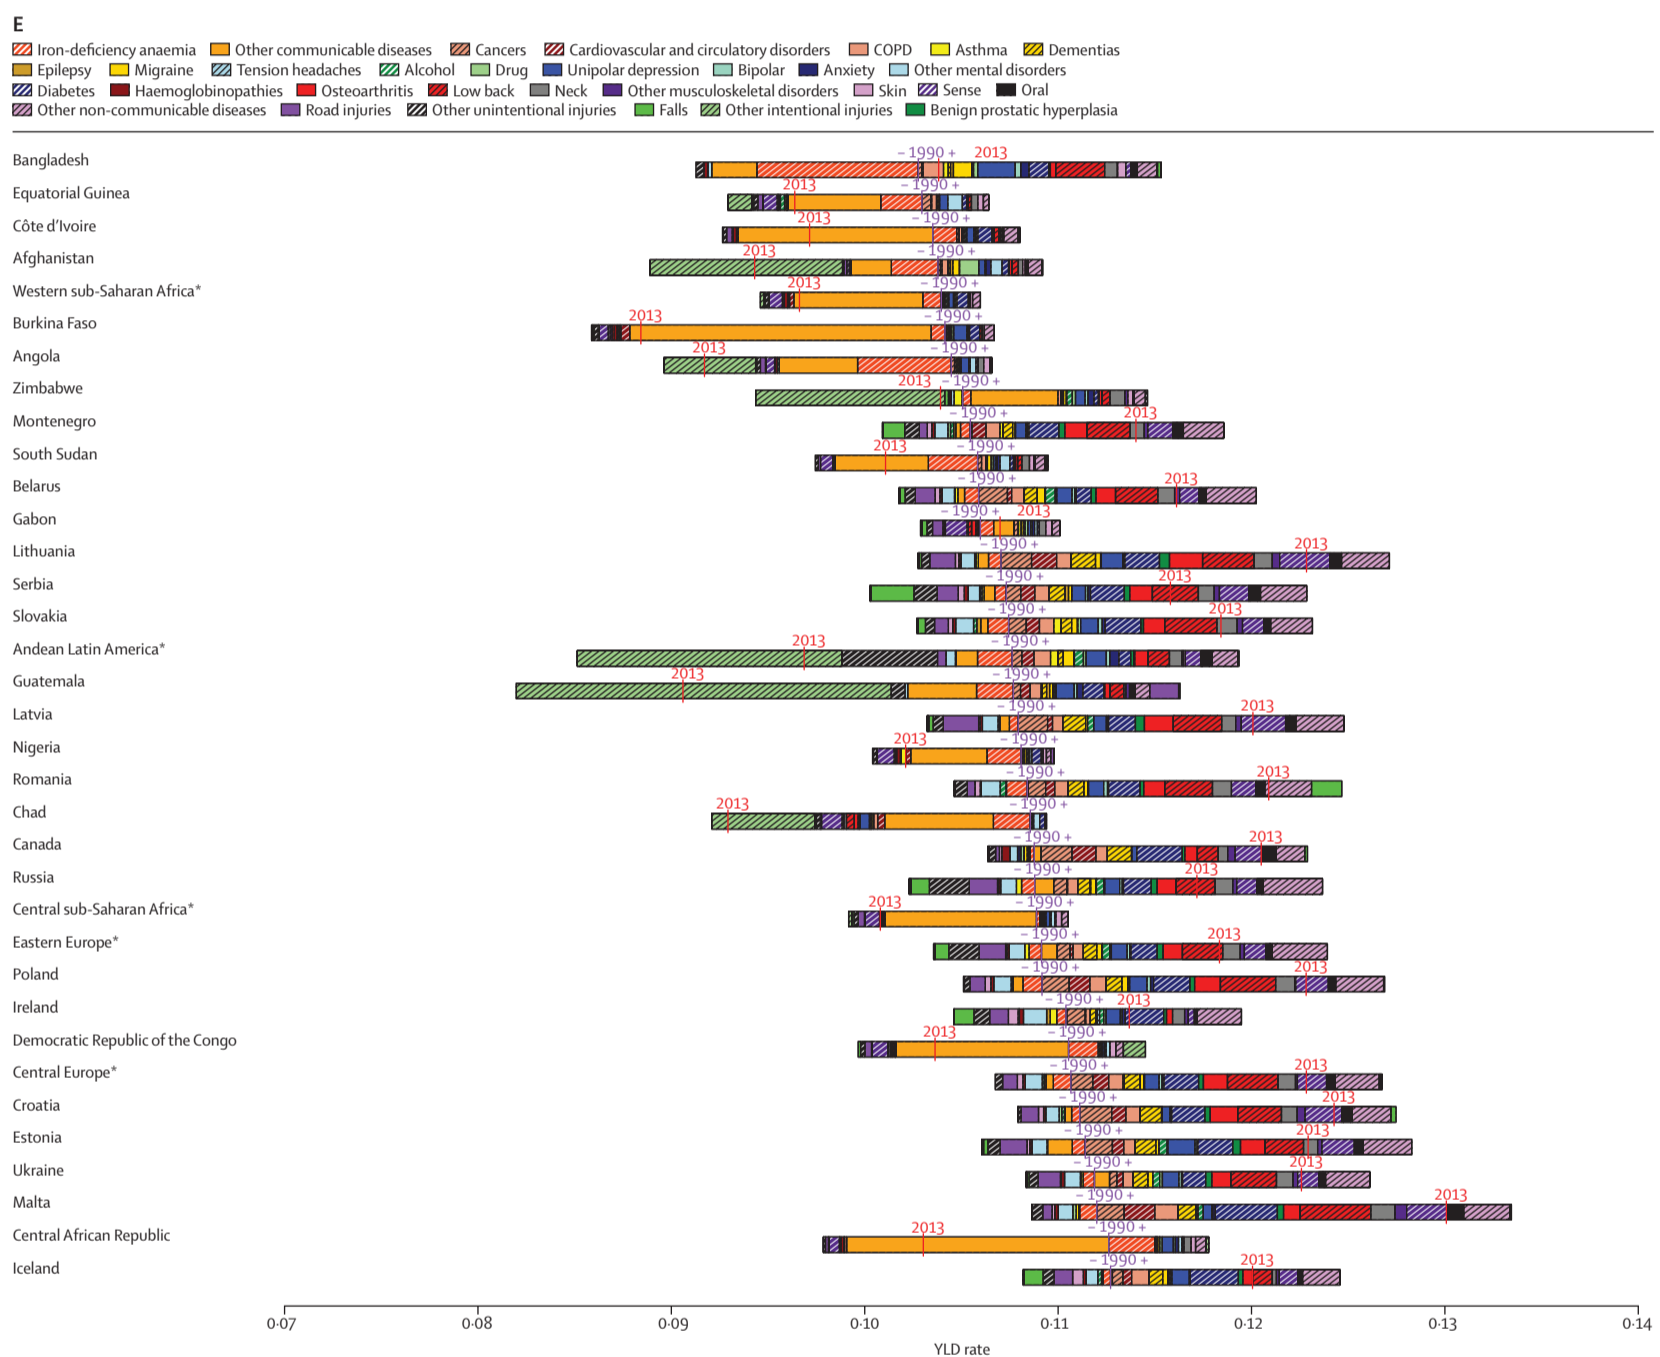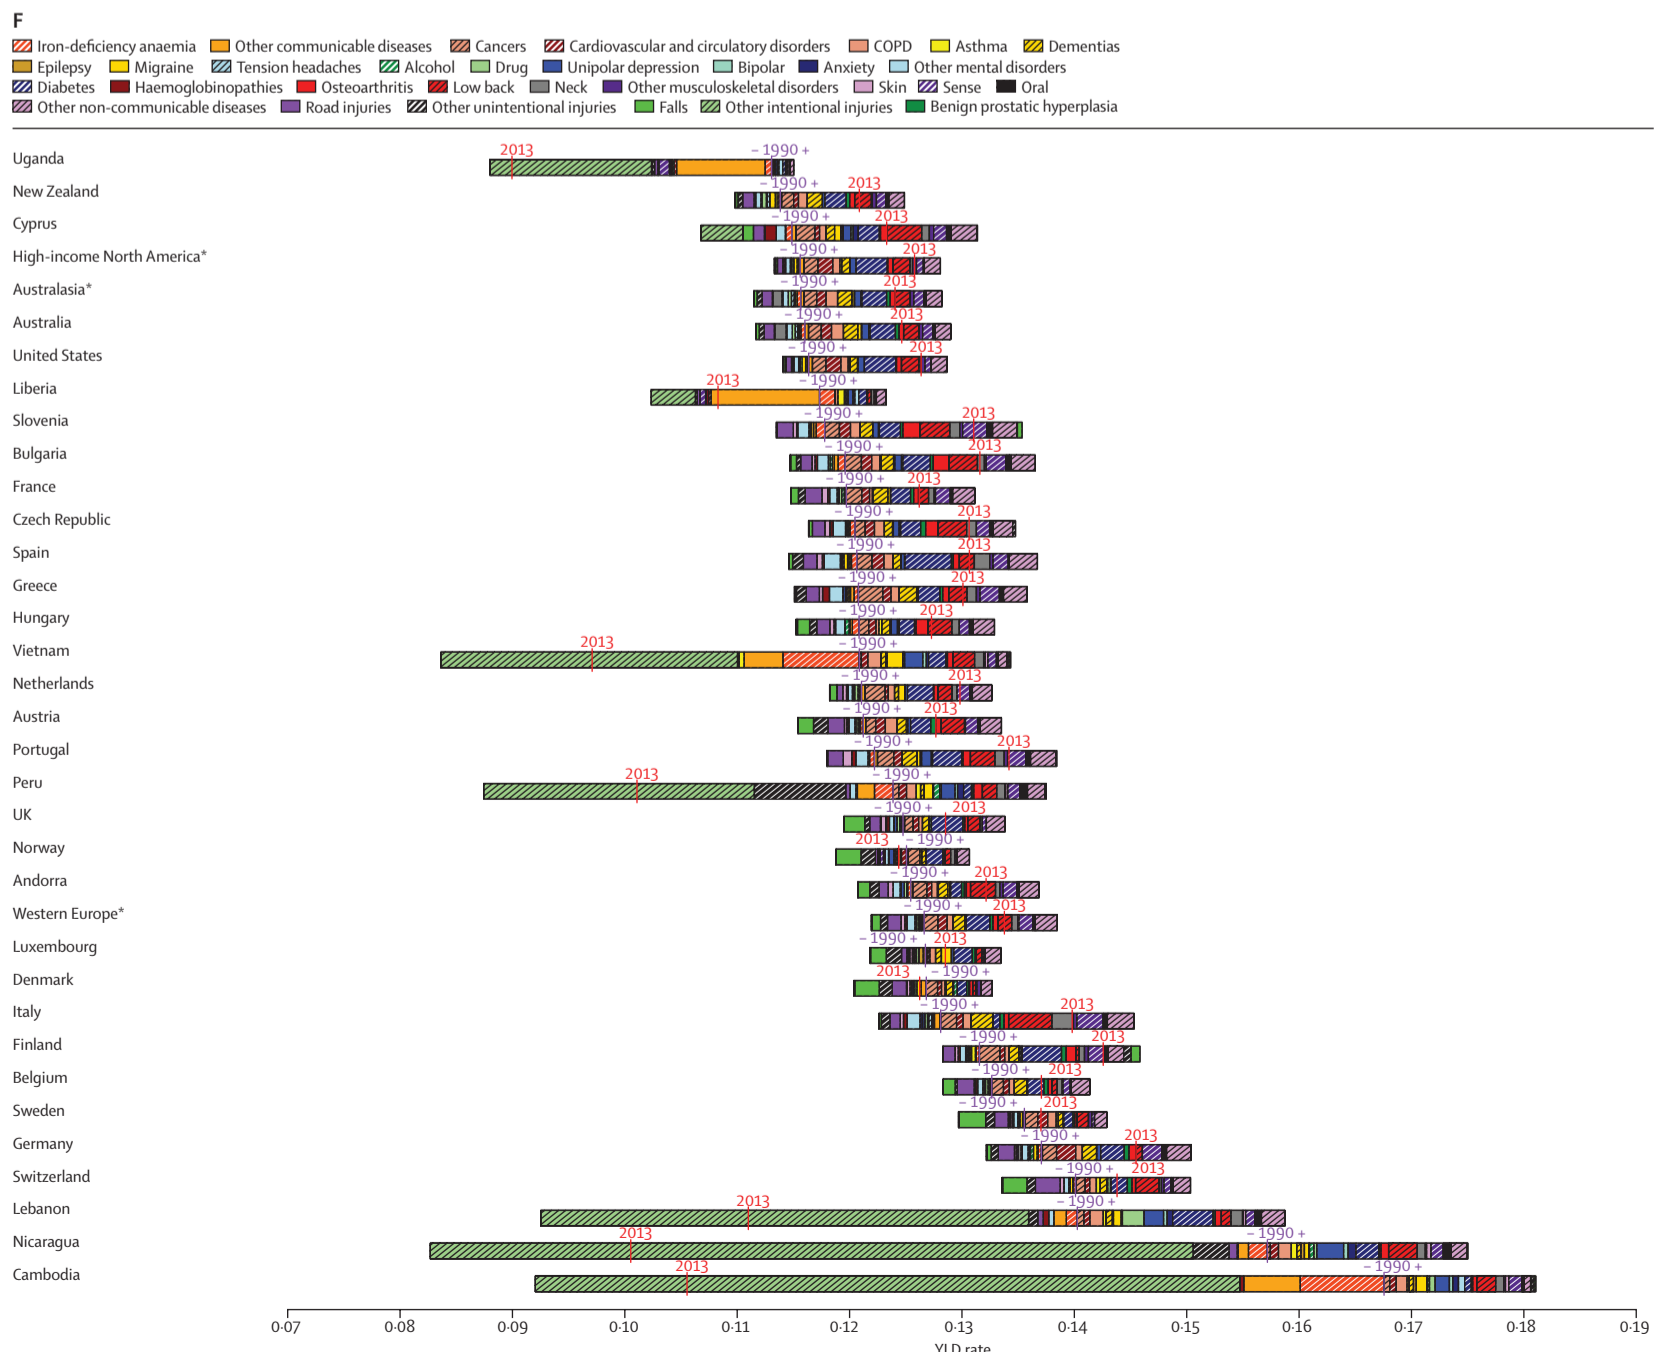

**Figure appendix: Change in YLD rate from 1990 to 2013 for 188 countries and 21 regions (changes have been decomposed into 31 major cause groups and countries are ordered by the YLD rate in 1990)**  
 Reductions in YLD rates per person from a cause from 1990 to 2013 are shown as coloured bars to the left of the 1990 starting level and increases in YLD rates per person from a cause are shown as bars to the right of the starting line.  
 YLD=years lived with disability. COPD=chronic obstructive pulmonary disease. \*Regions.
